# Supplementary material for: RNA sequencing reveals a transcriptomic portrait of human mesenchymal stem cells from bone marrow, adipose tissue, and palatine tonsils
Source: PubMed Central journal article supplement (PMC5719355; doi:10.1038/s41598-017-16788-2), 2017-12-07
Supplement: 41598_2017_16788_MOESM1_ESM.pdf [file 41598_2017_16788_MOESM1_ESM.pdf]

**RNA sequencing reveals a transcriptomic portrait of human mesenchymal stem cells from bone marrow, adipose tissue, and palatine tonsils.**

Kyung-Ah Cho<sup>1</sup>, Minhwa Park<sup>1</sup>, Yu-Hee Kim<sup>1</sup>, So-Youn Woo<sup>1</sup>, and Kyung-Ha Ryu<sup>2,\*</sup>

<sup>1</sup>Department of Microbiology, College of Medicine, Ewha Womans University, Seoul 07985, Republic of Korea

<sup>2</sup>Department of Pediatrics, College of Medicine, Ewha Womans University, Seoul 07985, Republic of Korea

\*Corresponding author:

Kyung-Ha Ryu, MD, PhD

Department of Pediatrics, College of Medicine, Ewha Womans University, Seoul 07985, Republic of Korea

Tel: 82-2-2650-5500

Fax: 82-2-2653-3718

E-mail address: ykh@ewha.ac.kr

# Supplementary Figure 1

(A)

AMs / BMs 2FC UP

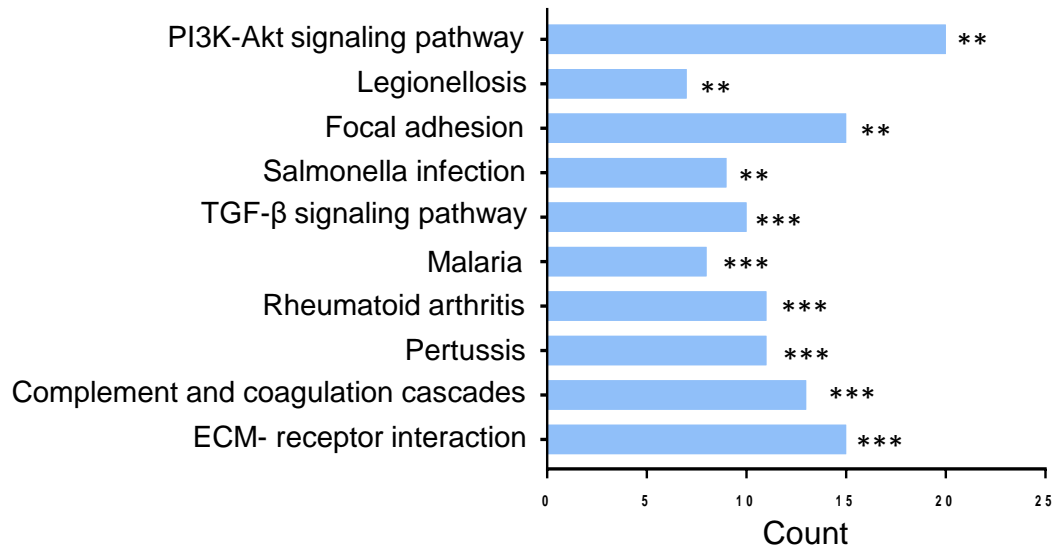

AMs / BMs 2FC DOWN

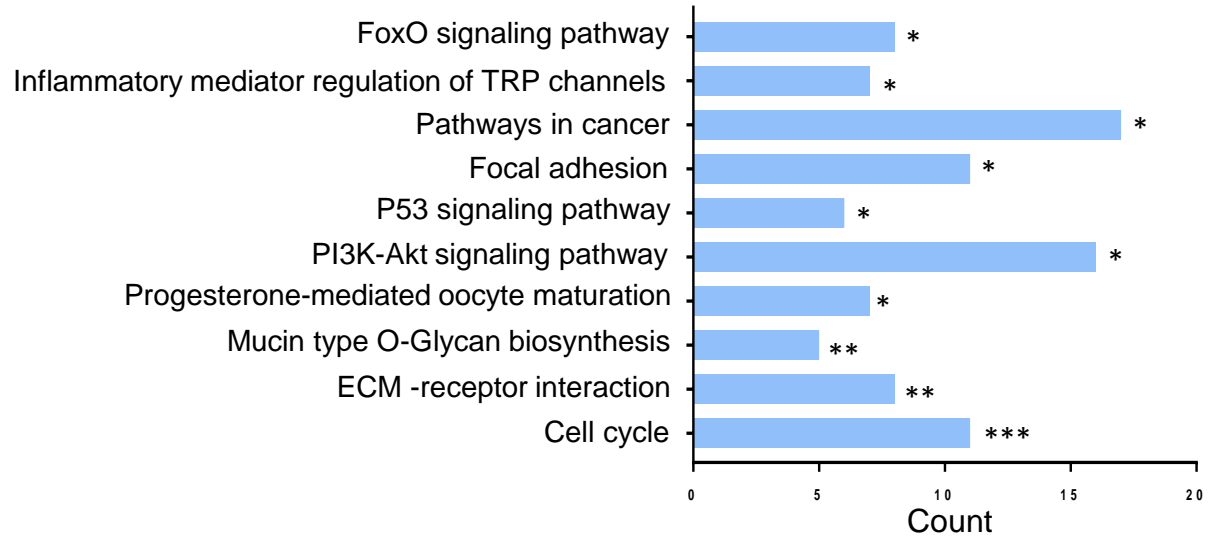

# Supplementary Figure 1

(B)

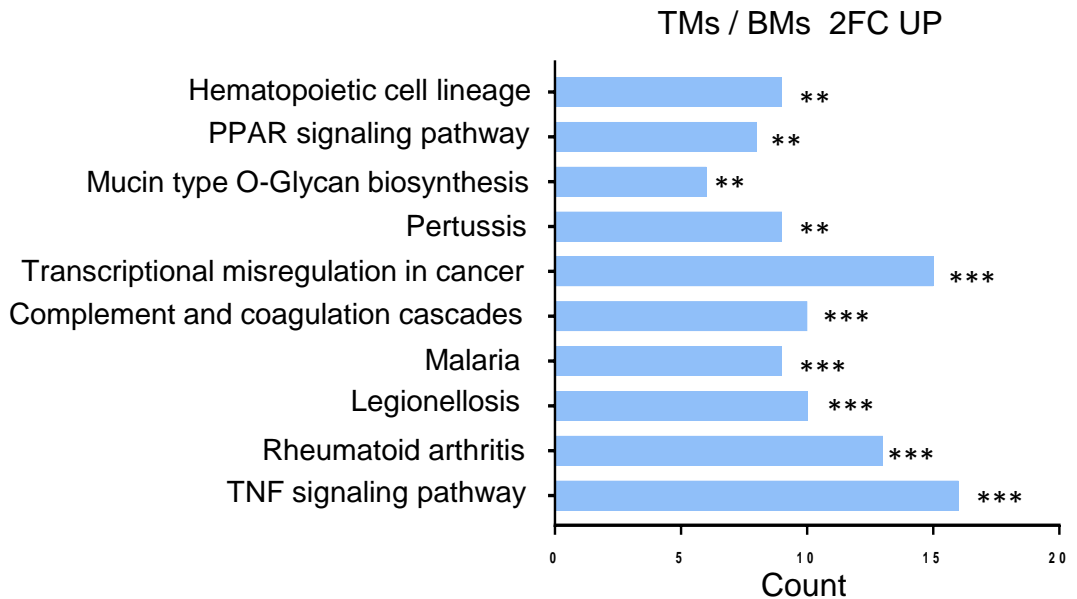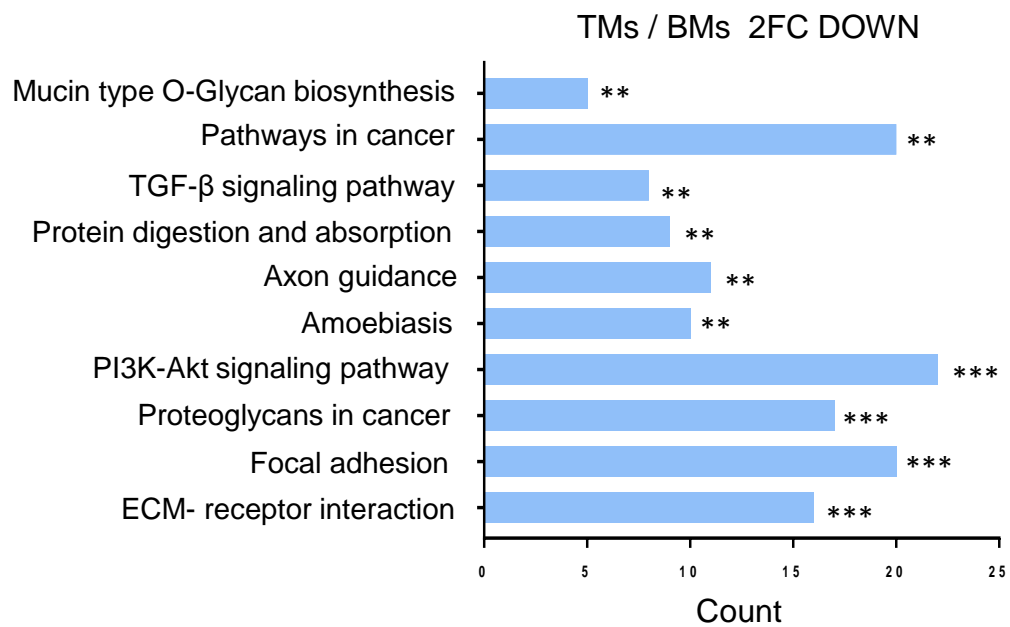

# Supplementary Figure 1

(C)

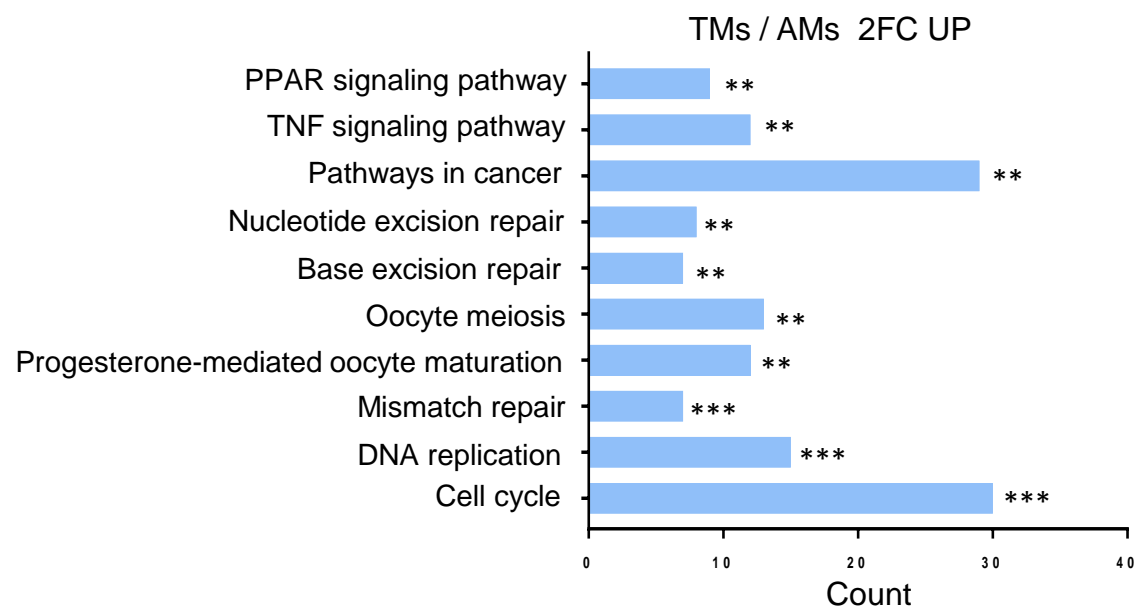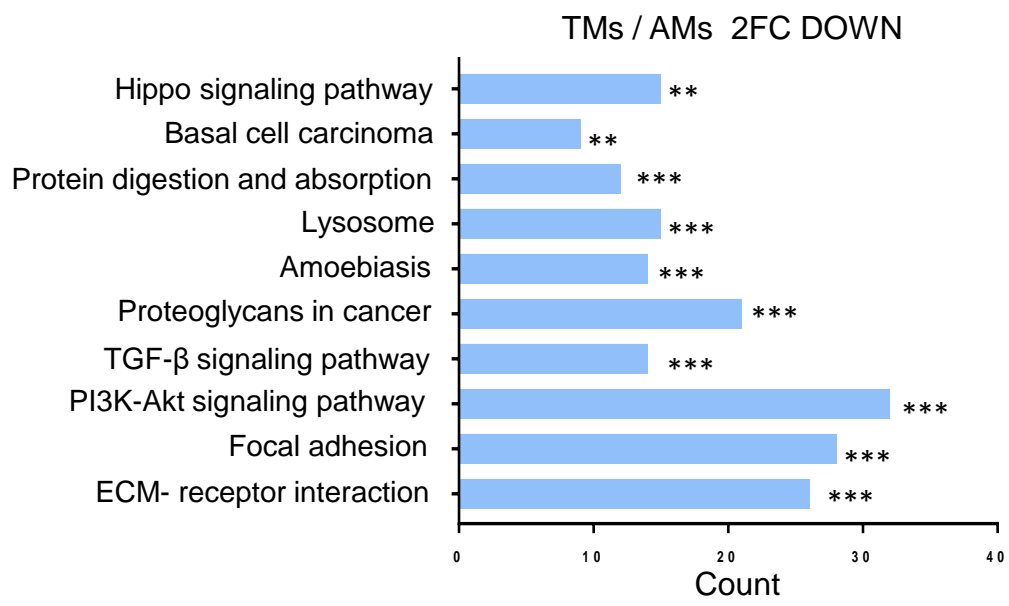

# Supplementary Figure 1

(D)

TMs 3,4 / TMs 1,2 2FC UP

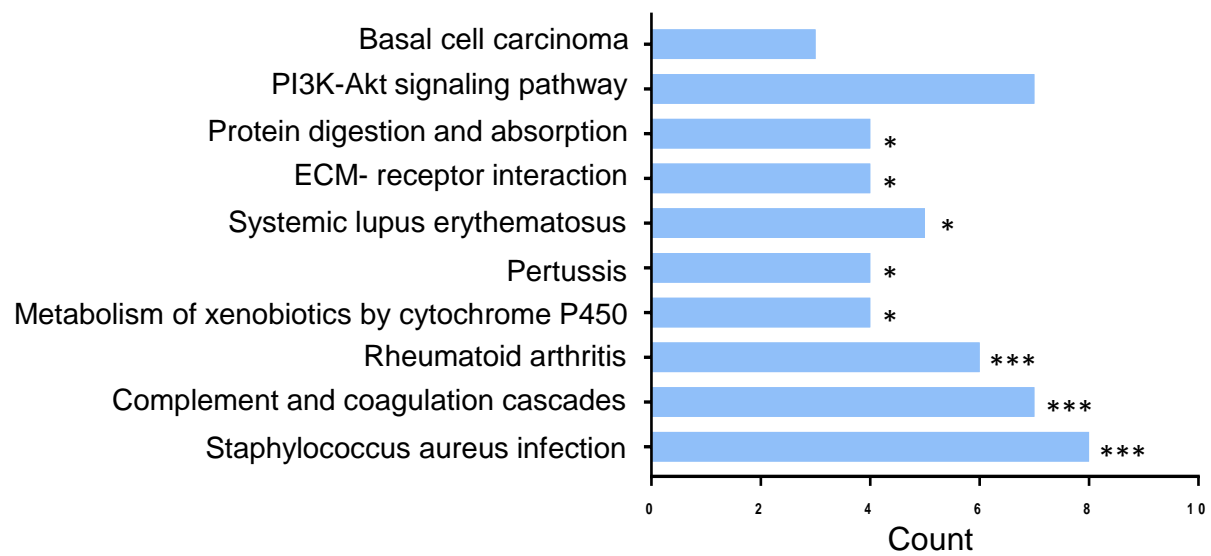

TMs 3,4 / TMs 1,2 2FC DOWN

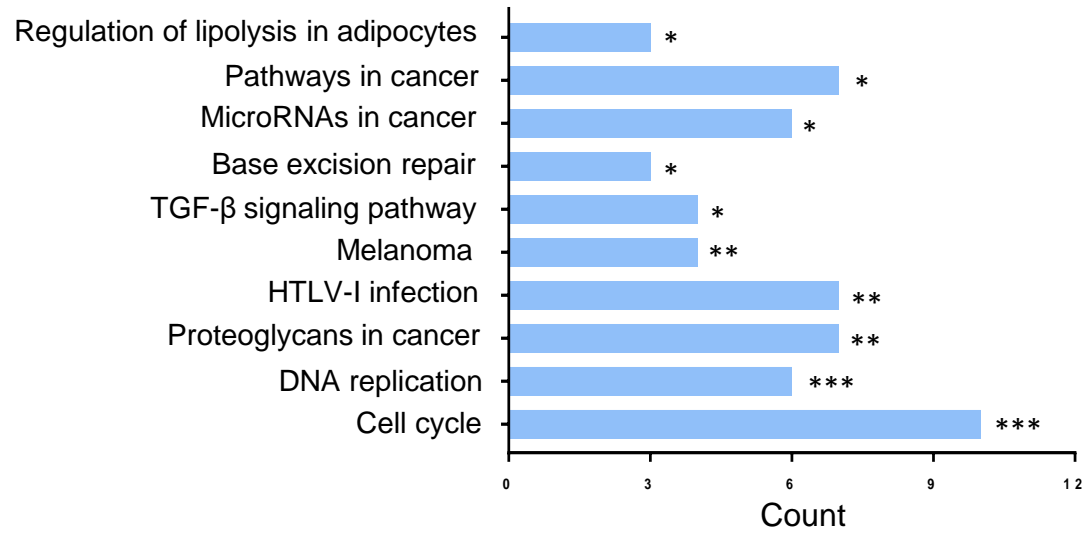

# Supplementary Figure 2

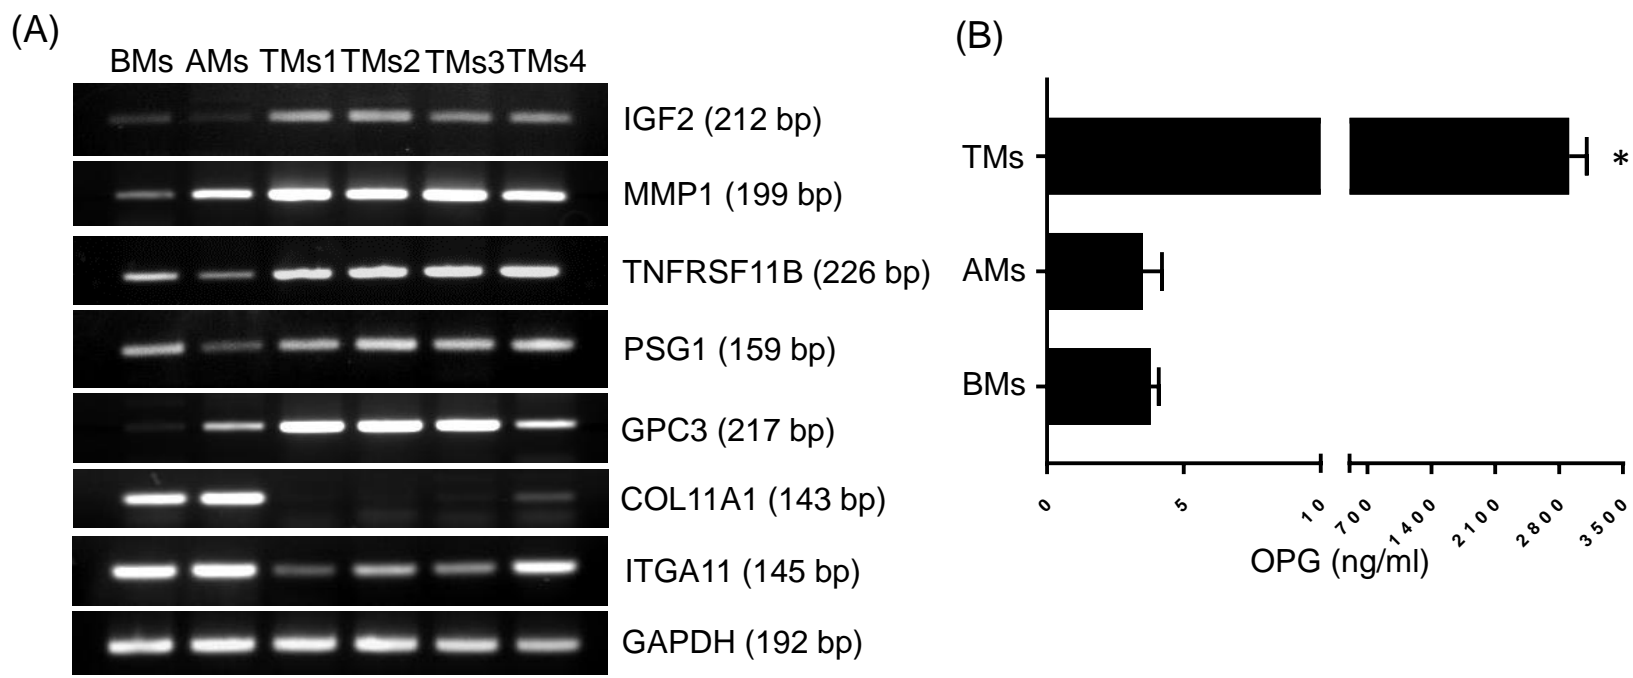

## OCs differentiation

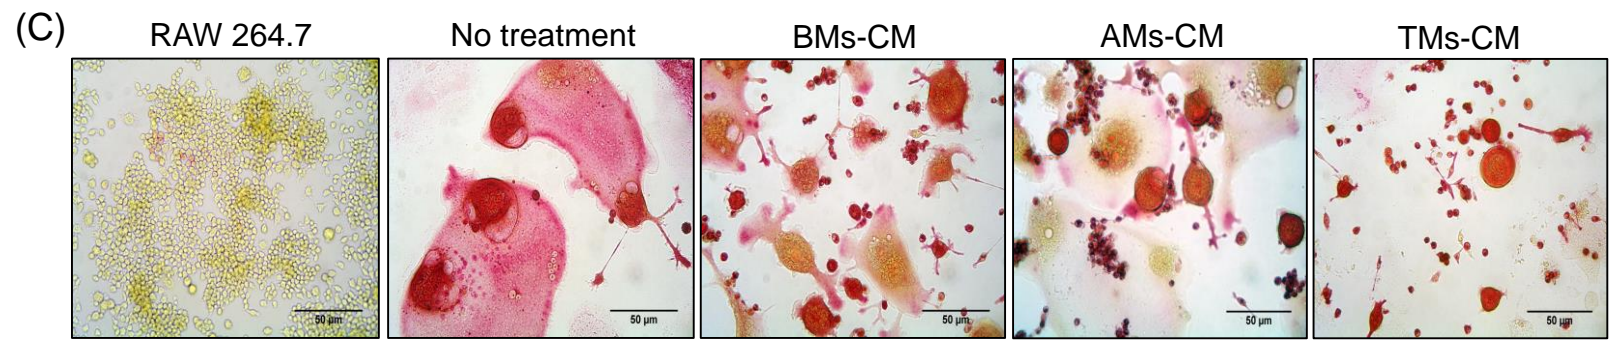

(A)

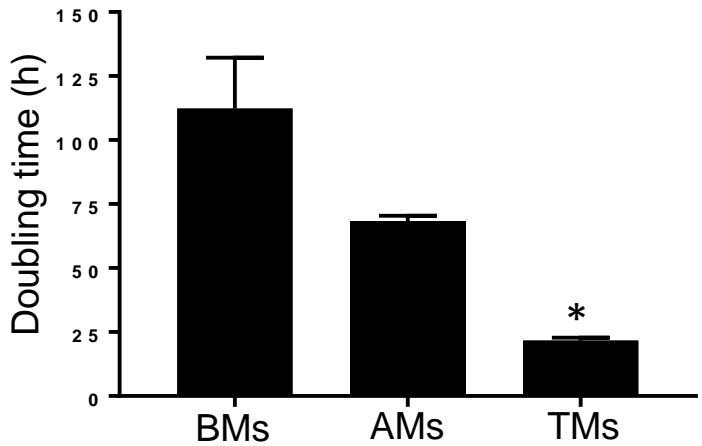

(B)

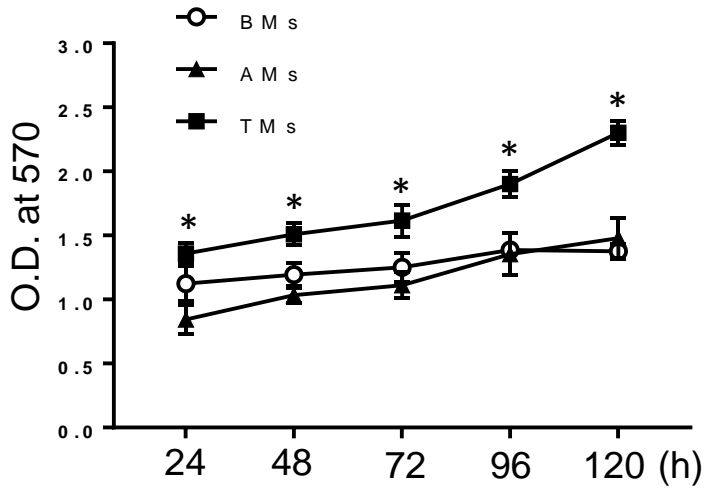

## Supplementary Figure Legends

**Supplementary Figure 1. Functional KEGG pathway analysis.** Up-regulated or down-regulated genes were categorized into enriched functional signaling pathways. (A) The top 10 categories up-regulated (upper) or down-regulated (lower) in AMs compared with BMs are shown (\* $P < 0.05$ , \*\* $P < 0.01$ , \*\*\* $P < 0.001$ ). (B) The top 10 categories up-regulated (upper) or down-regulated (lower) in TMs compared with BMs are shown (\*\* $P < 0.01$ , \*\*\* $P < 0.001$ ). (C) The top 10 categories up-regulated (upper) or down-regulated (lower) in TMs compared with AMs are shown (\*\* $P < 0.01$ , \*\*\* $P < 0.001$ ). (D) The top 10 categories up-regulated (upper) or down-regulated (lower) in TMs 3,4 compared with TMs 1, 2 are shown (\* $P < 0.05$ , \*\* $P < 0.01$ , \*\*\* $P < 0.001$ ).

**Supplementary Figure 2. Validation of RNA-seq result and functional assay on OCLs differentiation.** Upregulated gene particularly in TMs, TNFRSF11B was validated the levels of encoding protein, OPG, and functions. (A) Selected genes were amplified from BMs, AMs, and TMs by RT-PCR to confirm the expression patterns observed in RNA-seq. (B) The protein level of OPG, encoded by TNFRSF11B gene was measured by ELISA in conditioned medium from BMs (BMs-CM), AMs (AMs-CM), and TMs (TMs-CM). The data are presented as the mean  $\pm$  SEM (\* $P < 0.05$ ). (C) RAW 264.7 cells were differentiated into OCLs in the presence of BMs-CM, AMs-CM, or TMs-CM and the differentiation efficiency was confirmed by TRAP stain. OCLs were indicated as TRAP-positive multinucleated cells.

**Supplementary Figure 3. Comparison of proliferation rate between MSCs.** The proliferation rate was analyzed in BMs, AMs, and TMs. (A) The trypan blue method was used to calculate the doubling time of BMs, AMs, and TMs. TMs showed significantly shorter doubling time in comparison with BMs and AMs. The data are presented as the mean  $\pm$  SEM (\* $P < 0.05$ ). (B) The proliferation kinetics of BMs, AMs, and TMs were analyzed by MTT assay. 100% was determined based on the result of MTT assay on the seeding day. A significantly



higher proliferation was seen in TMs cultures in comparison with BMs and AMs. The data are presented as the mean  $\pm$  SEM (\* $P$ <0.05).

**Table I. Primers used for RT-PCR**

| <b>Primers</b> | <b>Sequences</b>                      | <b>Product size (bp)</b> |
|----------------|---------------------------------------|--------------------------|
| IGF2           | F: 5'-ACACCCTCCAGTTCGTCTGT-3'         | 212                      |
|                | R: 5'-GGGGTATCTGGGGAAGTTGT-3'         |                          |
| MMP1           | F: 5'-CTCTGGAGTAATGTCACACCTCT-3'      | 199                      |
|                | R: 5'-TGTTGGTCCACCTTTCATCTTC-3'       |                          |
| TNFRSF11B      | F: 5'-GCGCTCGTGTTTCTGGACA-3'          | 226                      |
|                | R: 5'-AGTATAGACACTCGTCACTGGTG-3'      |                          |
| PSG1           | F: 5'-GACTCCAGACGCAAGCTACC-3'         | 159                      |
|                | R: 5'-GCACTCACTGGGTTCCGTAT-3'         |                          |
| GPC3           | F: 5'-CCTTTGAAATTGTTGTTCCGCCA-3'      | 217                      |
|                | R: 5'-CCTGGGTTTCATTAGCTGGGTA-3'       |                          |
| COL11A1        | F: 5'-TAACATCGCTGACGGGAAGTG-3'        | 143                      |
|                | R: 5'-CCGTGATTCCATTGGTATCAACA-3'      |                          |
| ITGA11         | F: 5'-GTCACCCTGTCCAACGTGTC-3'         | 145                      |
|                | R: 5'-ACATCCCTGTGGTGTAGTAGG-3'        |                          |
| GAPDH          | F: 5'-GGTAAAGTGGATATTGTTGCCATCAATG-3' | 192                      |
|                | R: 5'-GGAGGGATCTCGCTCCTGGAAGATGGTG-3' |                          |

Table II. Top 50 transcripts up-regulated in TMs compared to BMs

| Transcript_ID | Gene_Symbol | Gene_Description                                        | TM/BM.fc |
|---------------|-------------|---------------------------------------------------------|----------|
| NM_002421     | MMP1        | matrix metalloproteinase 1                              | 176.7    |
| NM_002422     | MMP3        | matrix metalloproteinase 3                              | 136.1    |
| NM_001178096  | F3          | coagulation factor III                                  | 64       |
| NM_001297773  | PSG1        | pregnancy-specific beta-1-glycoprotein 1                | 51.6     |
| NM_001271368  | PTGS1       | prostaglandin-endoperoxide synthase 1                   | 50       |
| NM_001999     | FBN2        | fibrillin 2                                             | 44.5     |
| NM_001511     | CXCL1       | chemokine (C-X-C motif) ligand 1                        | 40.4     |
| NM_130386     | COLEC12     | collectin sub-family member 12                          | 28.2     |
| NM_021570     | BARX1       | BARX homeobox 1                                         | 27.2     |
| NM_000584     | IL8         | interleukin 8                                           | 23.1     |
| NM_000599     | IGFBP5      | insulin-like growth factor binding protein 5            | 23       |
| NM_015419     | MXRA5       | matrix-remodelling associated 5                         | 22       |
| NM_004221     | IL32        | interleukin 32                                          | 20.1     |
| NM_001879     | MASP1       | mannan-binding lectin serine peptidase 1                | 18.5     |
| NM_198148     | CPXM2       | carboxypeptidase X (M14 family), member 2               | 18.5     |
| NM_001193451  | TMTC1       | transmembrane and tetratricopeptide repeat containing 1 | 18.2     |
| NM_001198695  | MFAP4       | microfibrillar-associated protein 4                     | 16.6     |
| NM_003012     | SFRP1       | secreted frizzled-related protein 1                     | 15.4     |

|              |            |                                                                                                                   |      |
|--------------|------------|-------------------------------------------------------------------------------------------------------------------|------|
| NM_001164617 | GPC3       | glypican 3                                                                                                        | 15.1 |
| NM_001281534 | EPB41L3    | erythrocyte membrane protein band 4.1-like 3                                                                      | 14.4 |
| NM_052889    | CARD16     | caspase recruitment domain family, member 16                                                                      | 13.2 |
| NM_001199640 | IL33       | interleukin 33                                                                                                    | 12.9 |
| NM_019554    | S100A4     | S100 calcium binding protein A4                                                                                   | 12.9 |
| NM_000612    | IGF2       | insulin-like growth factor II                                                                                     | 12.9 |
| NM_005382    | NEFM       | neurofilament                                                                                                     | 12.7 |
| NM_153202    | ADAM33     | ADAM metallopeptidase domain 33                                                                                   | 11.9 |
| NM_053001    | OSR2       | odd-skipped related transcription factor 2                                                                        | 11.8 |
| NM_000916    | OXTR       | oxytocin receptor                                                                                                 | 11.7 |
| NM_000640    | IL13RA2    | interleukin 13 receptor, alpha 2                                                                                  | 11.3 |
| NM_002546    | TNFRSF11B  | tumor necrosis factor receptor superfamily, member 11b                                                            | 11.3 |
| NM_001193335 | ASPN       | asporin                                                                                                           | 11.3 |
| NM_001177969 | VIT        | vitrin                                                                                                            | 11.2 |
| NM_001124    | ADM        | adrenomedullin                                                                                                    | 10.3 |
| NM_000504    | F10        | coagulation factor X                                                                                              | 10.2 |
| NM_000961    | PTGIS      | prostaglandin I2 (prostacyclin) synthase                                                                          | 10.2 |
| NM_006194    | PAX9       | paired box 9                                                                                                      | 10   |
| NM_000902    | MME        | membrane metallo-endopeptidase                                                                                    | 9.7  |
| NM_030965    | ST6GALNAC5 | ST6 (alpha-N-acetyl-neuraminy-2,3-beta-galactosyl<br>1, 3)-N-acetylgalactosaminide alpha- 2,6-sialyltransferase 5 | 9.1  |

|              |         |                                                            |     |
|--------------|---------|------------------------------------------------------------|-----|
| NM_014059    | RGCC    | regulator of cell cycle                                    | 9.1 |
| NM_016235    | GPRC5B  | G protein-coupled receptor, family C, group 5, member B    | 9   |
| NM_001025201 | CHN1    | chimerin 1                                                 | 9   |
| NM_018584    | CAMK2N1 | calcium/calmodulin-dependent protein kinase II inhibitor 1 | 8.8 |
| NM_002729    | HHEX    | hematopoietically expressed homeobox                       | 8.4 |
| NM_001992    | F2R     | coagulation factor II (thrombin) receptor                  | 8.2 |
| NM_000597    | IGFBP2  | insulin-like growth factor binding protein 2               | 8.1 |
| NM_001270468 | SOCS2   | suppressor of cytokine signaling 2                         | 8   |
| NM_001165035 | FBLN2   | fibulin 2                                                  | 8   |
| NM_001114173 | CTSC    | cathepsin C                                                | 7.8 |
| NM_001199893 | ACTG2   | actin, gamma 2                                             | 7.8 |
| NM_002889    | RARRES2 | retinoic acid receptor responder (tazarotene induced) 2    | 7.7 |

---

Abbreviations: TMs, Tonsil-derived Mesenchymal stem cells; BMs, Bone marrow-derived Mesenchymal stem cells

Table III. Top 50 transcripts down-regulated in TMs compared to BMs

| Transcript_ID | Gene_Symbol | Gene_Description                                          | TM/BM.fc |
|---------------|-------------|-----------------------------------------------------------|----------|
| NM_001004439  | ITGA11      | integrin, alpha 11                                        | -62.3    |
| NM_001135934  | POSTN       | periostin                                                 | -46.2    |
| NM_006211     | PENK        | proenkephalin                                             | -42.5    |
| NM_015865     | SLC14A1     | solute carrier family 14 (urea transporter), member 1     | -37.8    |
| NM_001253900  | MEST        | mesoderm specific transcript                              | -22.2    |
| NM_014391     | ANKRD1      | ankyrin repeat domain 1                                   | -21.2    |
| NM_002575     | SERPINB2    | serpin peptidase inhibitor, clade B (ovalbumin), member 2 | -20.2    |
| NM_001077427  | LYPD1       | LY6/PLAUR domain containing 1                             | -19.5    |
| NM_001040058  | SPP1        | secreted phosphoprotein 1                                 | -19      |
| NM_002016     | FLG         | filaggrin                                                 | -18.7    |
| NM_001177520  | ALPL        | alkaline phosphatase, liver/bone/kidney                   | -18.3    |
| NM_138444     | KCTD12      | potassium channel tetramerization domain containing 12    | -12.9    |
| NM_001001557  | GDF6        | growth differentiation factor 6                           | -12.3    |
| NM_006744     | RBP4        | retinol binding protein 4, plasma                         | -12.1    |
| NM_152753     | SCUBE3      | signal peptide, CUB domain, EGF-like 3                    | -11.8    |
| NM_001281767  | EPHA5       | EPH receptor A5                                           | -11.6    |
| NM_001270989  | EPGN        | epithelial mitogen                                        | -10.8    |
| NM_004415     | DSP         | desmoplakin                                               | -10.5    |

|              |          |                                                                                                    |      |
|--------------|----------|----------------------------------------------------------------------------------------------------|------|
| NM_001845    | COL4A1   | collagen, type IV, alpha 1                                                                         | -9.7 |
| NM_001165252 | KRTAP2-3 | keratin associated protein 2-3                                                                     | -9.5 |
| NM_001293815 | ALDH1A3  | aldehyde dehydrogenase family 1 member A3                                                          | -9.3 |
| NM_181709    | FAM101A  | family with sequence similarity 101, member A                                                      | -8.8 |
| NM_005020    | PDE1C    | phosphodiesterase 1C                                                                               | -8.6 |
| NM_024812    | BAALC    | brain and acute leukemia, cytoplasmic                                                              | -8.2 |
| NM_016932    | SIX2     | SIX homeobox 2                                                                                     | -8.1 |
| NM_001282431 | ARL4C    | ADP-ribosylation factor-like 4C                                                                    | -8   |
| NM_005244    | EYA2     | eyes absent homolog 2                                                                              | -8   |
| NM_001031700 | FAM198B  | family with sequence similarity 198, member B                                                      | -8   |
| NM_001283012 | DEPTOR   | DEP domain containing MTOR-interacting protein                                                     | -8   |
| NM_015719    | COL5A3   | collagen, type V, alpha 3                                                                          | -7.9 |
| NM_003603    | SORBS2   | sorbin and SH3 domain containing 2                                                                 | -7.8 |
| NM_000104    | CYP1B1   | cytochrome P450, family 1, subfamily B, polypeptide 1                                              | -7.7 |
| NM_020474    | GALNT1   | UDP-N-acetyl-alpha-D-galactosamine:polypeptide<br>N-acetylgalactosaminyltransferase 14 (GalNAc-T1) | -7.5 |
| NM_001206850 | NLGN4Y   | neuroligin 4, Y-linked                                                                             | -7.5 |
| NM_006988    | ADAMTS1  | ADAM metallopeptidase with thrombospondin type 1 motif, 1                                          | -7.4 |
| NM_001163446 | CPA4     | carboxypeptidase A4                                                                                | -7.4 |
| NM_006762    | LAPTM5   | lysosomal protein transmembrane 5                                                                  | -7.3 |
| NM_001142480 | NREP     | neuronal regeneration related protein                                                              | -7.3 |

|              |           |                                                                                                    |      |
|--------------|-----------|----------------------------------------------------------------------------------------------------|------|
| NM_002192    | INHBA     | inhibin, beta A                                                                                    | -7.1 |
| NM_005556    | KRT7      | keratin 7                                                                                          | -7.1 |
| NM_001136530 | SERPINE2  | serpin peptidase inhibitor, clade E, member 2                                                      | -7.1 |
| NM_000557    | GDF5      | growth differentiation factor 5                                                                    | -6.9 |
| NM_018092    | NETO2     | neuropilin (NRP) and tolloid (TLL)-like 2                                                          | -6.6 |
| NM_000435    | NOTCH3    | notch 3                                                                                            | -6.6 |
| NM_001007538 | SHISA2    | shisa family member 2                                                                              | -6.6 |
| NR_040001    | LINC01116 | long intergenic non-protein coding RNA 1116                                                        | -6.4 |
| NM_022166    | XYLT1     | xylosyltransferase I                                                                               | -6.4 |
| NM_014568    | GALNT5    | UDP-N-acetyl-alpha-D-galactosamine:polypeptide<br>N-acetylgalactosaminyltransferase 14 (GalNAc-T5) | -6.4 |
| NM_001080477 | TENM3     | teneurin transmembrane protein 3                                                                   | -6.3 |
| NM_001025368 | VEGFA     | vascular endothelial growth factor A                                                               | -6.2 |

---

Abbreviations: TMs, Tonsil-derived Mesenchymal stem cells; BMs, Bone marrow-derived Mesenchymal stem cells



Table IV. Top 50 transcripts up-regulated in TMs compared to AMs

| Transcript_ID | Gene_Symbol | Gene_Description                                 | TM/AM.fc |
|---------------|-------------|--------------------------------------------------|----------|
| NM_001297773  | PSG1        | pregnancy-specific beta-1-glycoprotein 1         | 46.5     |
| NM_018476     | BEX1        | brain expressed, X-linked 1                      | 37.2     |
| NM_000597     | IGFBP2      | insulin-like growth factor binding protein 2     | 24.4     |
| NM_021570     | BARX1       | BARX homeobox 1                                  | 21.1     |
| NM_002421     | MMP1        | matrix metalloproteinase 1                       | 20.6     |
| NM_000612     | IGF2        | insulin-like growth factor II                    | 14.6     |
| NM_000601     | HGF         | hepatocyte growth factor                         | 14.6     |
| NM_003012     | SFRP1       | secreted frizzled-related protein 1              | 11.2     |
| NM_052889     | CARD16      | caspase recruitment domain family, member 16     | 11       |
| NM_000730     | CCKAR       | cholecystokinin A receptor                       | 10       |
| NM_013409     | FST         | follistatin                                      | 9.5      |
| NM_001199640  | IL33        | interleukin 33                                   | 9.5      |
| NM_004932     | CDH6        | cadherin 6                                       | 9.3      |
| NM_001291812  | FGF5        | fibroblast growth factor 5                       | 8.9      |
| NM_002729     | HHEX        | hematopoietically expressed homeobox             | 8.9      |
| NM_006194     | PAX9        | paired box 9                                     | 8.8      |
| NM_001256566  | F2RL2       | coagulation factor II (thrombin) receptor-like 2 | 8.7      |
| NM_005192     | CDKN3       | cyclin-dependent kinase inhibitor 3              | 8.6      |

|              |            |                                                                                                                    |     |
|--------------|------------|--------------------------------------------------------------------------------------------------------------------|-----|
| NM_001282382 | PTTG1      | pituitary tumor-transforming 1                                                                                     | 8.4 |
| NM_030965    | ST6GALNAC5 | ST6 (alpha-N-acetyl-neuraminyl-2,3-beta-galactosyl-1, 3)-<br>N-acetylgalactosaminide alpha-2,6-sialyltransferase 5 | 8.1 |
| NM_005226    | S1PR3      | sphingosine-1-phosphate receptor 3                                                                                 | 8.1 |
| NM_001193451 | TMTC1      | transmembrane and tetratricopeptide repeat containing 1                                                            | 8.1 |
| NM_001255    | CDC20      | cell division cycle 20                                                                                             | 8   |
| NM_001164617 | GPC3       | glypican 3                                                                                                         | 8   |
| NM_133459    | CCBE1      | collagen and calcium binding EGF domains 1                                                                         | 7.9 |
| NM_014059    | RGCC       | regulator of cell cycle                                                                                            | 7.8 |
| NM_001253827 | GALNT14    | UDP-N-acetyl-alpha-D-galactosamine:polypeptide<br>N-acetylgalactosaminyltransferase 14 (GalNAc-T14)                | 7.3 |
| NM_003258    | TK1        | thymidine kinase 1                                                                                                 | 7.3 |
| NM_001199241 | KYNU       | kynureninase                                                                                                       | 7.3 |
| NM_002825    | PTN        | pleiotrophin                                                                                                       | 7.3 |
| NM_001177969 | VIT        | vitrin                                                                                                             | 7.2 |
| NM_001199893 | ACTG2      | actin, gamma 2                                                                                                     | 7.1 |
| NM_001277990 | CXCL12     | chemokine (C-X-C motif) ligand 12                                                                                  | 7.1 |
| NM_017449    | EPHB2      | EPH receptor B2                                                                                                    | 7   |
| NM_005382    | NEFM       | neurofilament                                                                                                      | 7   |
| NM_031246    | PSG2       | pregnancy specific beta-1-glycoprotein 2                                                                           | 7   |
| NM_031453    | FAM107B    | family with sequence similarity 107, member B                                                                      | 6.8 |

|              |           |                                                        |     |
|--------------|-----------|--------------------------------------------------------|-----|
| NM_002546    | TNFRSF11B | tumor necrosis factor receptor superfamily, member 11b | 6.8 |
| NM_006877    | GMPR      | guanosine monophosphate reductase                      | 6.7 |
| NM_005733    | KIF20A    | kinesin family member 20A                              | 6.7 |
| NM_001100620 | TROAP     | trophinin associated protein                           | 6.6 |
| NM_206827    | RASL11A   | RAS-like, family 11, member A                          | 6.6 |
| NM_001032280 | TFAP2A    | transcription factor AP-2 alpha                        | 6.6 |
| NR_001447    | MT1L      | metallothionein 1L                                     | 6.6 |
| NM_198148    | CPXM2     | carboxypeptidase X (M14 family), member 2              | 6.6 |
| NM_130386    | COLEC12   | collectin sub-family member 12                         | 6.5 |
| NM_053001    | OSR2      | odd-skipped related transcription factor 2             | 6.5 |
| NM_001271368 | PTGS1     | prostaglandin-endoperoxide synthase 1                  | 6.4 |
| NM_001144996 | ITGA7     | integrin, alpha 7                                      | 6.3 |
| NM_003248    | THBS4     | thrombospondin 4                                       | 6.2 |

---

Abbreviations: TMs, Tonsil-derived Mesenchymal stem cells; AMs, Adipose tissue-derived Mesenchymal stem cells

Table V. Top 50 transcripts down-regulated in TMs compared to AMs

| Transcript_ID | Gene_Symbol | Gene_Description                               | TM/AM.fc |
|---------------|-------------|------------------------------------------------|----------|
| NM_000095     | COMP        | cartilage oligomeric matrix protein            | -155.6   |
| NM_001004439  | ITGA11      | integrin, alpha 11                             | -63.8    |
| NM_001253900  | MEST        | mesoderm specific transcript                   | -37.5    |
| NM_002016     | FLG         | filaggrin                                      | -32.9    |
| NM_199187     | KRT18       | keratin 18                                     | -29.3    |
| NM_001297709  | MFAP5       | microfibrillar-associated protein 5            | -23      |
| NM_080629     | COL11A1     | collagen, type XI, alpha 1                     | -22.9    |
| NM_001283012  | DEPTOR      | DEP domain containing MTOR-interacting protein | -21.2    |
| NM_001293815  | ALDH1A3     | aldehyde dehydrogenase family 1 member A3      | -20.5    |
| NM_032532     | FNDC1       | fibronectin type III domain containing 1       | -19.4    |
| NM_000362     | TIMP3       | TIMP metalloproteinase inhibitor 3             | -19.4    |
| NM_001244889  | UNC5B       | unc-5 homolog B                                | -19      |
| NM_007281     | SCRG1       | stimulator of chondrogenesis 1                 | -18.8    |
| NM_001080477  | TENM3       | teneurin transmembrane protein 3               | -18.4    |
| NM_001855     | COL15A1     | collagen, type XV, alpha 1                     | -15.9    |
| NM_001135     | ACAN        | aggrecan                                       | -15.6    |
| NM_001003396  | TPD52L1     | tumor protein D53                              | -14.1    |
| NM_004936     | CDKN2B      | cyclin-dependent kinase inhibitor 2B           | -14      |

|              |          |                                                           |       |
|--------------|----------|-----------------------------------------------------------|-------|
| NM_139072    | DNER     | delta/notch-like EGF repeat containing                    | -13.6 |
| NM_001031700 | FAM198B  | family with sequence similarity 198, member B             | -13.1 |
| NM_004750    | CRLF1    | cytokine receptor-like factor 1                           | -13.1 |
| NM_000526    | KRT14    | keratin 14                                                | -13   |
| NM_001135934 | POSTN    | periostin                                                 | -12.9 |
| NM_002345    | LUM      | lumican                                                   | -12.4 |
| NM_003391    | WNT2     | wingless-type MMTV integration site family member 2       | -11.7 |
| NM_001935    | DPP4     | dipeptidyl-peptidase 4                                    | -11.6 |
| NM_000638    | VTN      | vitronectin                                               | -11.5 |
| NM_001079520 | DACT1    | dishevelled-binding antagonist of beta-catenin 1          | -11.5 |
| NM_000576    | IL1B     | interleukin 1, beta                                       | -11.4 |
| NM_001145106 | FIBCD1   | fibrinogen C domain containing 1                          | -11.4 |
| NM_001792    | CDH2     | cadherin 2                                                | -10.9 |
| NM_003062    | SLIT3    | slit homolog 3                                            | -10.8 |
| NM_005929    | MFI2     | antigen p97 (melanoma associated)                         | -10.6 |
| NM_018837    | SULF2    | sulfatase 2                                               | -10.4 |
| NM_001278074 | COL5A1   | collagen, type V, alpha 1                                 | -10.4 |
| NM_002575    | SERPINB2 | serpin peptidase inhibitor, clade B (ovalbumin), member 2 | -10.2 |
| NM_016588    | NRN1     | neuritin 1                                                | -10.2 |
| NM_001163446 | CPA4     | carboxypeptidase A4                                       | -9.9  |
| NM_001136530 | SERPINE2 | serpin peptidase inhibitor, clade E, member 2             | -9.9  |

|           |          |                                                        |      |
|-----------|----------|--------------------------------------------------------|------|
| NM_005020 | PDE1C    | phosphodiesterase 1C                                   | -9.8 |
| NM_000683 | ADRA2C   | adrenoceptor alpha 2C                                  | -9.7 |
| NM_181726 | ANKRD37  | ankyrin repeat domain 37                               | -9.5 |
| NM_002237 | KCNG1    | potassium voltage-gated channel, subfamily G, member 1 | -9.4 |
| NM_004415 | DSP      | desmoplakin                                            | -9.4 |
| NM_000602 | SERPINE1 | serpin peptidase inhibitor, clade E), member 1         | -9.2 |
| NM_005606 | LGMN     | legumain                                               | -9.2 |
| NM_001718 | BMP6     | bone morphogenetic protein 6                           | -9.2 |
| NM_004669 | CLIC3    | chloride intracellular channel 3                       | -9.2 |
| NM_003014 | SFRP4    | secreted frizzled-related protein 4                    | -9.2 |
| NM_021936 | PAPPA2   | pappalysin 2                                           | -9.1 |

---

Abbreviations: TMs, Tonsil-derived Mesenchymal stem cells; AMs, Adipose tissue-derived Mesenchymal stem cells
