# Supplementary material for: RNA sequencing reveals a transcriptomic portrait of human mesenchymal stem cells from bone marrow, adipose tissue, and palatine tonsils
Source: PubMed Central journal article supplement (PMC5719355; doi:10.1038/s41598-017-16788-2), 2017-12-07

**RNA sequencing reveals a transcriptomic portrait of human mesenchymal stem cells from bone marrow, adipose tissue, and palatine tonsils.**

Kyung-Ah Cho<sup>1</sup>, Minhwa Park<sup>1</sup>, Yu-Hee Kim<sup>1</sup>, So-Youn Woo<sup>1</sup>, and Kyung-Ha Ryu<sup>2,\*</sup>

<sup>1</sup>Department of Microbiology, College of Medicine, Ewha Womans University, Seoul 07985, Republic of Korea

<sup>2</sup>Department of Pediatrics, College of Medicine, Ewha Womans University, Seoul 07985, Republic of Korea

\*Corresponding author:

Kyung-Ha Ryu, MD, PhD

Department of Pediatrics, College of Medicine, Ewha Womans University, Seoul 07985, Republic of Korea

Tel: 82-2-2650-5500

Fax: 82-2-2653-3718

E-mail address: ykh@ewha.ac.kr

IGF2

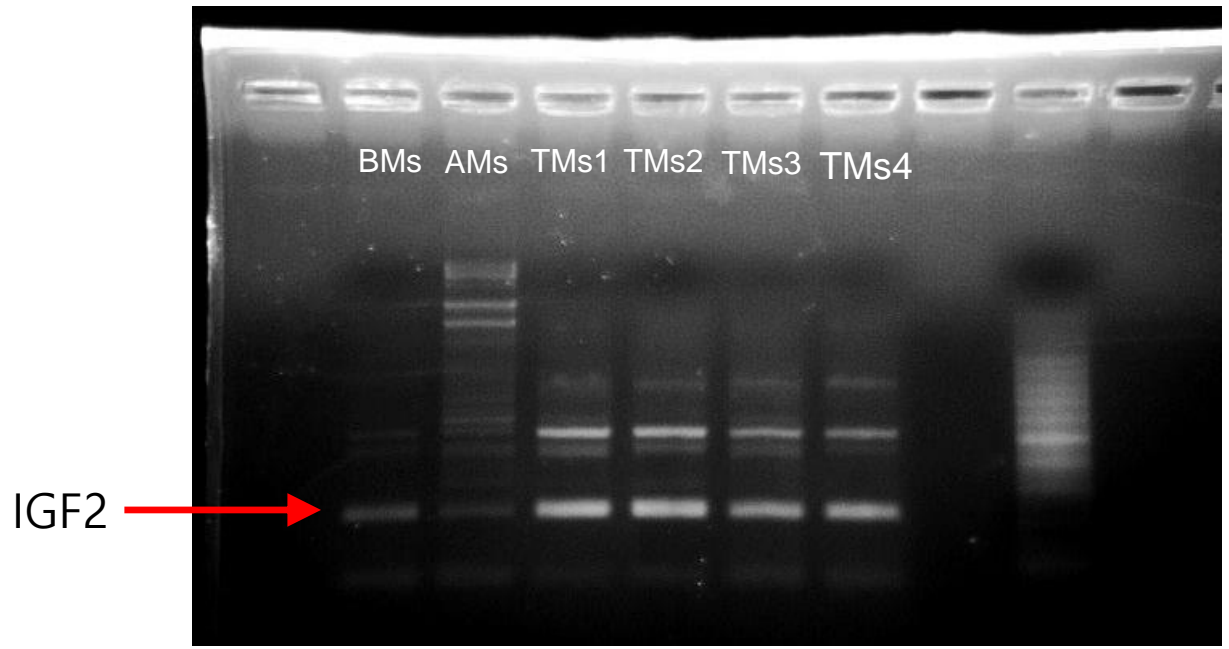

MMP1

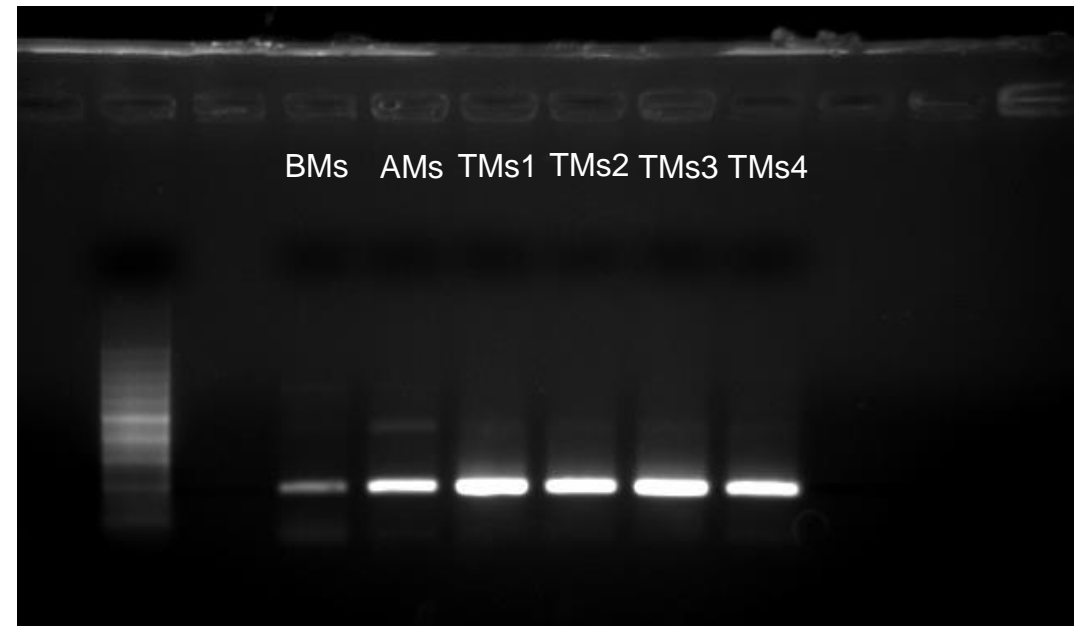

TNFRSF11B

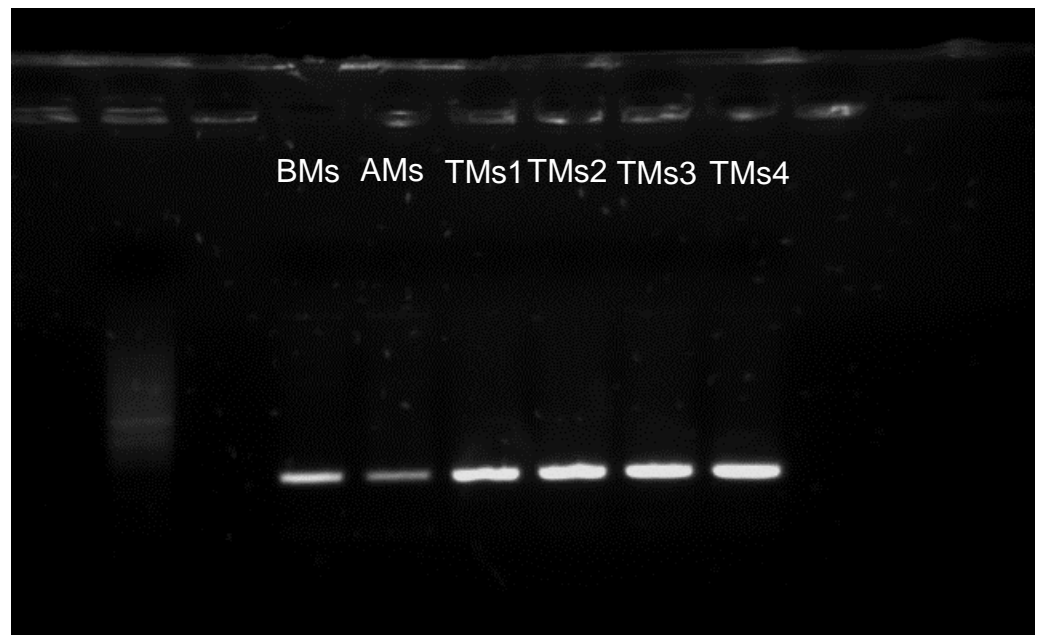

PSG1

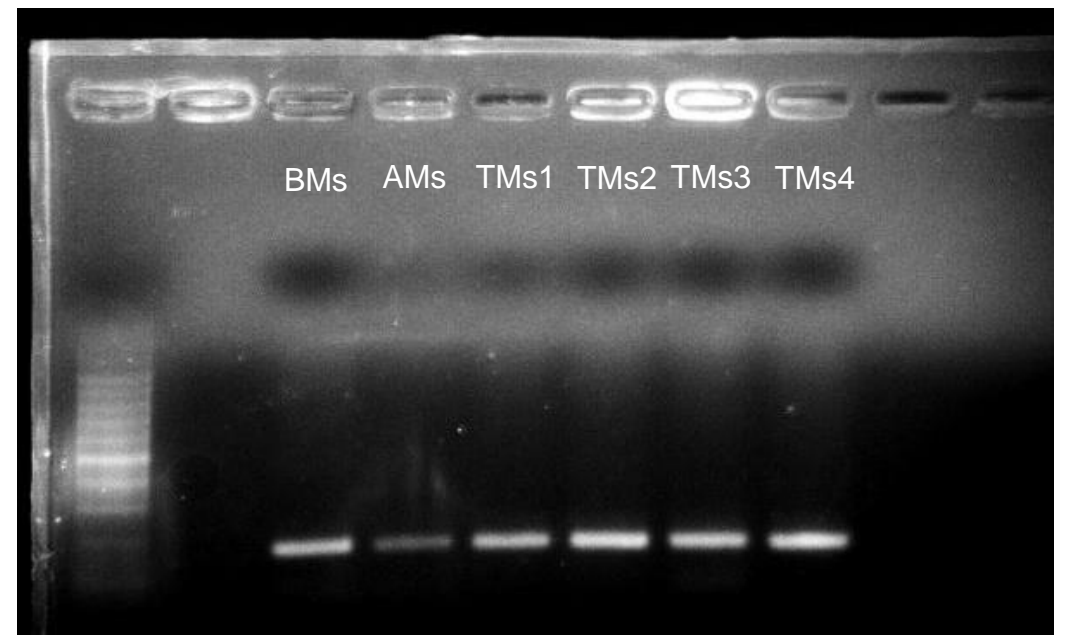

GPC3

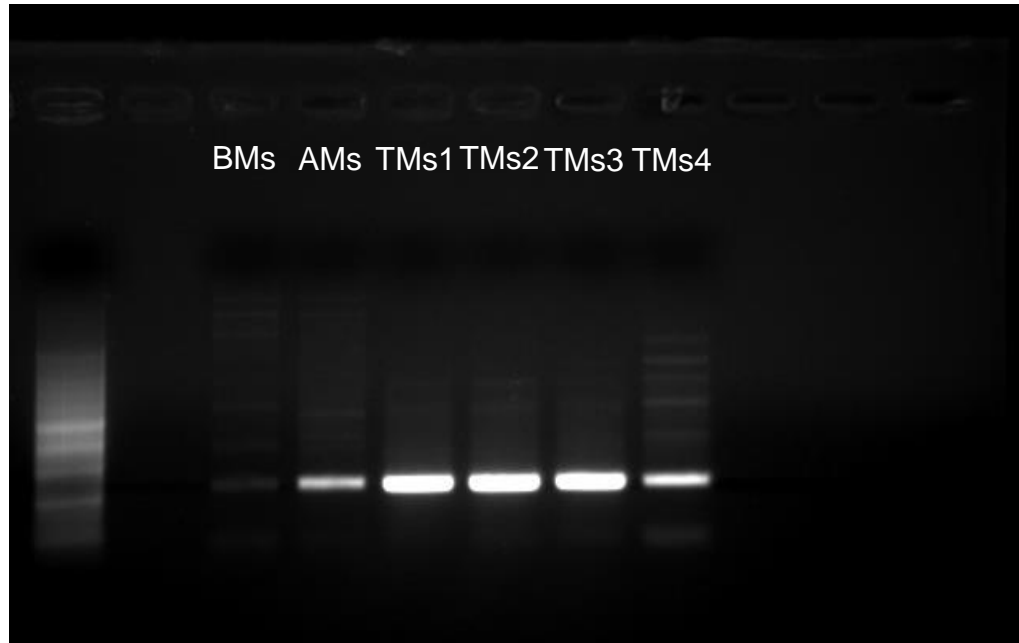

COL11A1

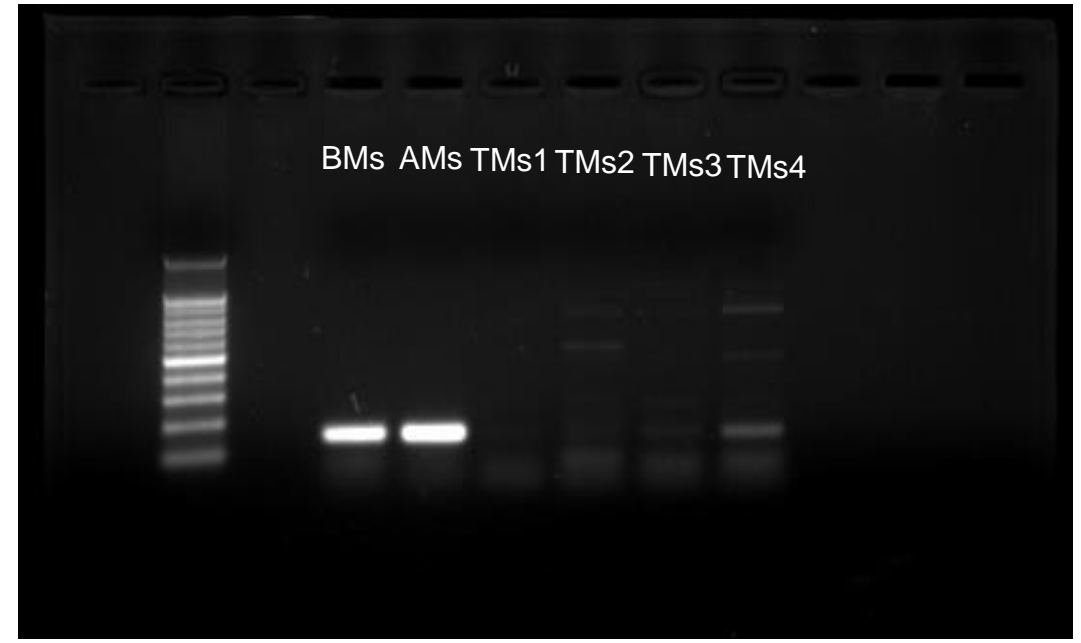

ITGA11

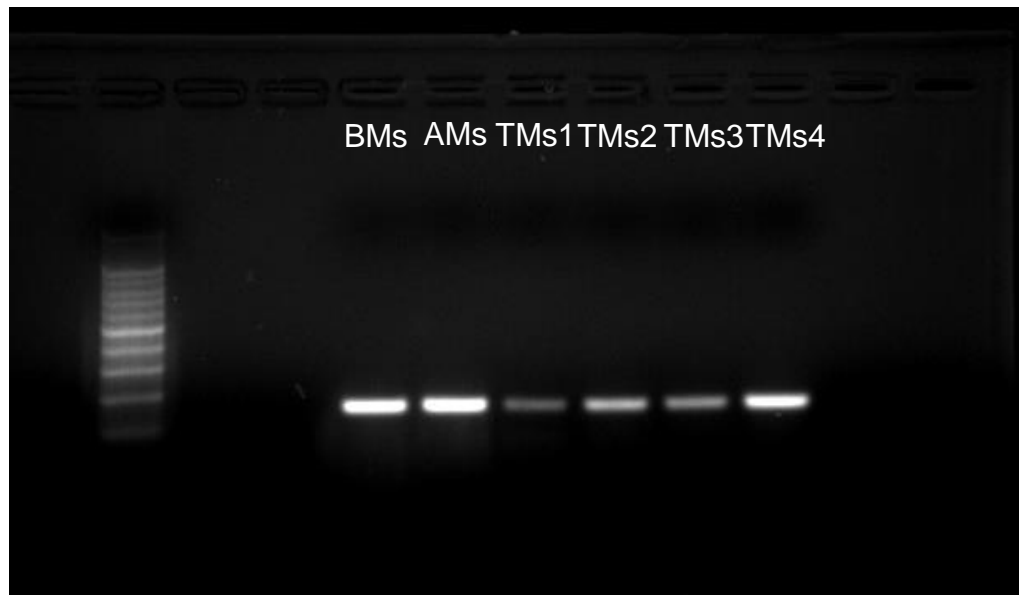

GAPDH

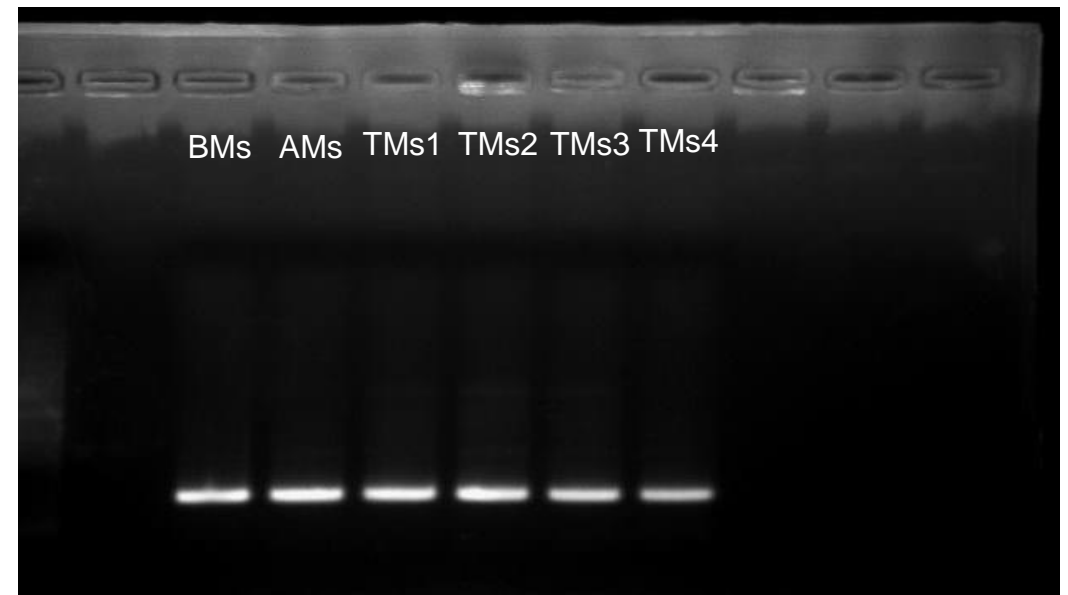

Supplement: 41598_2017_16788_MOESM2_ESM.pdf [file 41598_2017_16788_MOESM2_ESM.pdf]
